# Supplementary material for: Feasibility, acceptability and appropriateness of a reproductive patient reported outcome measure for cancer survivors
Source: PLoS One. 2021 Aug 27;16(8):e0256497. doi: 10.1371/journal.pone.0256497 (PMC8396734; doi:10.1371/journal.pone.0256497)
Supplement: S1 Data — (XLSX) [file pone.0256497.s003.xlsx]

## Sheet: PROM raw data
Gender	Age at diagnosis	Age stratified	Diagnosis	Cancer name	Relationship status	Sexual orientation	Do you have any suggestions to improve the wording of questions/responses?	Do you have any suggestions to improve the appropriateness?	Do you have any suggestions to improve the distinction between response choices?	Do you have any suggestions to improve the instructions?	Do you have any suggestions to improve the number of response options?	Do you have any suggestions to improve the order of topics?	Is the placement of instructions within the PROM adequate?	Do you think the information at the start of each heading was clear and useful?	Do you require new instructions for each question?	Would you make any changes to the format?	How long did it take to complete the questionnaire?	Was the length of the questionnaire appropriate?	Do you have any suggestions to improve the format?	Did you have difficulty understanding the words or sentence structure?	Which words or sentence structures did you have difficulty understanding?	Did you need to consult your own records to complete the questionnaire?	Did you complete the questionnaire by yourself or with help from a parent/friend/partner?	How would you feel about completing this questionnaire prior to your clinic appointment?	Were there any questions that you were unwilling to answer?	What were the topic areas and do you have any suggestions to improve these questions?	Were there any questions that made you feel uncomfortable?	What were the topic areas and do you have any suggestions to improve these questions?	How do you think the PROM will make a difference to your reproductive consultation, if at all?	Would this PROM help to bring up topics that you would not feel comfortable discussing with your doctor?	How could we improve the PROM so it identifies these reproductive concerns, if any?
Female	19	AYA	Ovarian tumour	Gynaecological cancers	In a relationship	Heterosexual	No	No	Yes	No	No	No	Yes	Yes	No	No	15-20 minutes	Just right	Yes	No	No	Yes	Mother	Fine	No	No	No	None	It has given me a few more topics/questions to bring up with my psychologist	Yes	None
Female	12	Paediatrics	ALL	Leukemia	In a relationship	Other	No	No	No	No	No	No	Yes	Yes	No	No	15-20 minutes	Just right	Yes	No	No	No	Myself	Fine	No	No	Yes	None		No	None
Female	17	AYA	ALL	Leukemia	In a relationship	Heterosexual	No	No	No	No	No	No	Yes	Yes	No	No	Greater than 30 minutes	Too long	No	No	No	No	Myself	Fine	Yes	No	Yes	None		No	None
Female	12	Paediatrics	ALL	Leukemia	Not in a relationship	Heterosexual	No	No	Yes	No	No	No	Yes	Yes	No	No	25-30 minutes	Just right	Yes	No	No	No	Myself	Fine	No	No	No	None		Yes	None
Female	11	Paediatrics	Diffuse pontine glioma	Neurological	In a relationship	Heterosexual	Several questions could be expressed more concisely. There are also a number of questions that are very similar, particularly in the section about reproduction.	No	Yes	No	No	No	Yes	Yes	No	Yes	10-15 minutes	Too long	Yes	No	No	No	Myself	Fine	No	No	No	None	I think it could be a good conversation starter around potentially awkward questions.	Yes	None
Female	25	AYA	Breast cancer	Breast cancer	In a relationship	Heterosexual	I believe that they are clean and understandable	Possibly addressing concerns of cancer risk during pregnancy and hormonal based concerns	Yes	No	No	No	Yes	Yes	No	No	10-15 minutes	Just right	Yes	No	No	No	Myself	Fine	No	No	No	None	I think it would allow discussion about sexual intimacy that patients and clinicians might shy away from discussing	Yes	None
Male	39	Adult	Non-hodgkin's lymphoma	Lymphoma	In a relationship	Heterosexual	No	No	Yes	No	No	No	Yes	Yes	No	No	5-10 minutes	Just right	Yes	No	Yes	No	Myself	Fine	No	No	Yes	None		Yes	None
Male	8	Paediatrics	acute lymphoblastic leukemia	Leukemia	In a relationship	Heterosexual	No	No	No	No	No	No	Yes	Yes	No	No	20-25 minutes	Too long	Yes	No	Yes	No	Myself	Fine	Yes	No	Yes	None		Yes	None
Female	26	Adult	cervical cancer	Gynaecological cancers	Not in a relationship	Gay/Lesbian	No	No	Yes	No	No	No	Yes	Yes	No	No	10-15 minutes	Just right	Yes	No	No	No	Myself	Fine	No	No	No	None		Yes	None
Female	37	Adult	Breast cancer	Breast cancer	In a relationship	Heterosexual	No	No	Yes	No	No	No	Yes	Yes	No	No	15-20 minutes	Just right	Yes	No	No	No	Myself	Fine	No	No	No	None	Make sure these issues are discussed in the first place and not overlooked	Yes	None
Male	30	Adult	PNET	Neurological	In a relationship	Heterosexual	No	No	Yes	No	No	No	Yes	Yes	No	No	15-20 minutes	Just right	Yes	No	No	No	Myself	Fine	No	No	No	None		Yes	None
Female	24	AYA	Ovarian Cancer	Gynaecological cancers	Not in a relationship	Bisexual	No	No	Yes	No	No	No	Yes	Yes	No	No	5-10 minutes	Just right	Yes	No	No	No	Myself	Fine	No	No	No	None		No	None
Female	4	Paediatrics	A.L.L	Leukemia	In a relationship	Bisexual	No	No	Yes	No	No	No	Yes	Yes	No	No	5-10 minutes	Just right	Yes	No	No	No	Myself	Fine	No	No	No	None	It allows people to answer/bring up questions if they are not comfortable to do so in person	Yes	None
Female	15	AYA	Hodgkins	Lymphoma	In a relationship	Heterosexual	Scaling should be uniform for agree disagree questions and feature over the length of page	No	Yes	No	Yes	No	Yes	Yes	Yes	No	5-10 minutes	Too long	Yes	No	No	No	Myself	Not fine	No	No	Yes	None	Maybe	Yes	None
Male	24	AYA	Stage 4 Hodgkin’s lymphoma		In a relationship	Heterosexual	No	No	Yes	No	No	No	Yes	Yes	No	No	5-10 minutes	Just right	Yes	No	No	No	Myself	Fine	No	No	No	None		Yes	None
Female	22	AYA	Cervical cancer	Gynaecological cancers	In a relationship	Heterosexual	No	No	Yes	No	No	No	Yes	Yes	No	No	15-20 minutes	Just right	Yes	No	No	No	Myself	Fine	No	No	No	None		Yes	None
Male	27	Adult	Testicular cancer	Testicular cancer	In a relationship	Heterosexual	Perhaps define the term sexually active. I left a relationship before my diagnosis and haven't been in one since.	No	Yes	No	No	No	Yes	Yes	No	No	15-20 minutes	Just right	Yes	No	No	No	Myself	Fine	No	No	No	None		No	None
Female	19	AYA	Ewing’s Sarcoam	Bone and soft tissue cancers	Not in a relationship	Heterosexual	No	No	Yes	No	No	No	Yes	Yes	No	No	5-10 minutes	Just right	Yes	No	No	No	Myself	Fine	No	No	No	None		Yes	None
Female	27	Adult	Osteosarcoma	Bone and soft tissue cancers	In a relationship	Heterosexual	No	No	Yes	No	No	No	Yes	Yes	No	No	25-30 minutes	Just right	Yes	No	No	No	Myself	Fine	No	No	No	None		Yes	None
Male	41	Adult	Skin	Skin	In a relationship	Heterosexual	No	No	Yes	No	No	No	Yes	Yes	No	No	15-20 minutes	Just right	Yes	No	No	No	Myself	Fine	No	No	No	None		Yes	None
Female	29	Adult	BREAST CANCER TWICE	Breast cancer	In a relationship	Heterosexual	No	No	Yes	No	No	No	Yes	Yes	No	No	15-20 minutes	Just right	Yes	No	No	no	Myself	Fine	No	No	No	None	no	No	None
Female	28	Adult	Breast	Breast cancer	In a relationship	Heterosexual	No	No	Yes	No	No	No	Yes	Yes	No	No	25-30 minutes	Just right	Yes	No	No	No	Myself	Fine	No	No	No	None		Yes	None
Male	16	AYA	Lymphoma	Lymphoma	Not in a relationship	Heterosexual	No	No	Yes	No	No	No	Yes	Yes	No	No	10-15 minutes	Just right	Yes	No	No	No	Myself	Fine	No	No	No	None		Yes	None
Female	4	Paediatrics	ALL	Leukemia	In a relationship	Heterosexual	No	No	No	No	No	No	Yes	Yes	No	No	20-25 minutes	Just right	Yes	No	Yes	No	Myself	Fine	Yes	No	Yes	None		Yes	None
Female	16	AYA	Stage 3 hodgkins lymphoma	Lymphoma	In a relationship	Heterosexual	No	No	No	No	No	No	Yes	Yes	No	No	5-10 minutes	Just right	Yes	No	No	No	Partner	Fine	No	No	No	None	Maybe induce more questions about fertility	Yes	None
Female	42	Adult	Carcianoma ductal invasovo da mama	Breast cancer	In a relationship	Heterosexual	No	No	No	No	No	No	Yes	Yes	No	No	5-10 minutes	Just right	Yes	No	No	No	Myself	Fine	No	No	No	None		No	None
Male	20	AYA	Hodgkins lymphoma	Lymphoma	Not in a relationship	Heterosexual	Some questions seem related to women (getting pregnant)	No	Yes	No	No	No	Yes	Yes	No	No	15-20 minutes	Just right	Yes	No	No	No	Myself	Fine	No	No	No	None	Not sure	Yes	None
Male	24	AYA	Hodgkins Lymphoma	Lymphoma	In a relationship	Heterosexual	No	No	Yes	No	No	No	Yes	Yes	No	No	10-15 minutes	Just right	Yes	No	No	No	Myself	Fine	No	No	No	None		Yes	None
Male	28	Adult	Testicular	Testicular cancer	Not in a relationship	Heterosexual	No	No	Yes	No	No	No	Yes	Yes	No	No	10-15 minutes	Just right	Yes	No	No	No	Myself	Fine	No	No	No	None		Yes	None
Female	30	Adult	Osteosarcoma	Bone and soft tissue cancers	Not in a relationship	Heterosexual	No	No	Yes	No	No	No	Yes	Yes	No	No	5-10 minutes	Just right	Yes	No	No	No	Myself	Fine	No	No	No	None		Yes	None
Male	21	AYA	germ cell tumour	Testicular cancer	Not in a relationship	Heterosexual	No	No	Yes	No	No	No	Yes	Yes	No	No	15-20 minutes	Just right	Yes	No	No	No	Myself	Fine	No	No	No	None		Yes	None
Male	19	AYA	ALL	Leukemia	Other	Heterosexual	No	No	No	No	No	No	Yes	Yes	No	No	15-20 minutes	Just right	No	No	Yes	No	Myself	Fine	Yes	No	Yes	None		Yes	None
Male	33	Adult	PNET	Neurological	In a relationship	Heterosexual	No	No	Yes	No	No	No	Yes	Yes	No	No	10-15 minutes	Just right	Yes	No	No	No	Myself	Fine	No	No	No	None		Yes	None
Female	19	AYA	Cervical cancer	Gynaecological cancers	In a relationship	Bisexual	No	No	No	No	No	No	Yes	Yes	No	No	25-30 minutes	Just right	No	No	Yes	No	Myself	Fine	Yes	No	Yes	None		Yes	None
Female	38	Adult	Breast cancer		In a relationship	Heterosexual	No	No	Yes	No	No	No	Yes	Yes	No	No	25-30 minutes	Just right	Yes	No	No	No	Myself	Fine	No	No	No	None		Yes	None
Male	32	Adult	Testicaler Cancer	Testicular cancer	Not in a relationship	Heterosexual	No	No	Yes	No	No	No	Yes	Yes	No	No	15-20 minutes	Just right	Yes	No	No	No	Myself	Fine	No	No	No	None		Yes	None
Female	23	AYA	Non-Hodgkins Lymphoma	Lymphoma	Not in a relationship	Heterosexual	No	Only negative expereinces I had was during fertility preservation. So could tailor questions towards that. Everything else included in the questionnaire was appropriate	Yes	No	No	No	Yes	Yes	No	No	10-15 minutes	Too long	Yes	No	No	No	Myself	Not fine	No	No	No	None	I don't know if the PROM will make much of a difference. Mostly because I don't feel my reproductive health has been significantly impacted by my diagnosis or treatment.	Yes	None
Female	19	AYA	Ewings Sarcoma		Not in a relationship	Heterosexual	No	No	Yes	No	No	No	Yes	Yes	No	No	Less than 5 minutes	Just right	Yes	No	No	No	Myself	Fine	Yes	No	No	None		Yes	None
Female	0	Paediatrics	Neuroblastoma	Neuroblastoma	In a relationship	Heterosexual	No	No	Yes	No	No	No	Yes	Yes	No	No	10-15 minutes	Just right	Yes	No	No	No	Myself	Fine	No	No	No	None		Yes	None
Female	16	AYA	Stage 3 hodgkins lymphoma	Lymphoma	In a relationship	Heterosexual	No	No	Yes	No	No	No	Yes	Yes	No	No	25-30 minutes	Just right	Yes	No	No	No	Myself	Fine	No	No	No	None		Yes	None
Female	21	AYA	Ewings		Not in a relationship	Heterosexual	No	No	Yes	No	No	No	Yes	Yes	No	No	10-15 minutes	Too long	Yes	No	No	No	Myself	Fine	No	No	No	None	Make sure that my parents are not around when I answer these questions	No	None
Female	15	AYA	Hodgkins lymphoma	Lymphoma	Not in a relationship	Heterosexual	No	No	Yes	No	No	No	Yes	Yes	Yes	No	5-10 minutes	Just right	Yes	No	No	No	Myself	Fine	No	No	No	None	None	No	None
Male	25	AYA	Thyroid cancer	Thyroid	In a relationship	Heterosexual	No	No	Yes	No	No	No	Yes	Yes	No	No	10-15 minutes	Too long	Yes	No	No	No	Myself	Fine	No	No	No	None		Yes	None
Male	24	AYA	Testicular cancer	Testicular cancer	Not in a relationship	Heterosexual	No	No	Yes	No	No	No	Yes	Yes	No	No	10-15 minutes	Just right	Yes	No	No	No	Myself	Fine	No	No	No	None		Yes	None
Female	31	Adult	breast cancer	Breast cancer	In a relationship	Heterosexual	Make sure there are other options where the topic is irrelevant	Yes make sure you let the patient know about the content in the questionnaire	Yes	No	No	No	Yes	Yes	No	Yes	20-25 minutes	Just right	Yes	No	No	No	Myself	Fine	No	No	No	None	I think it might help others have difficult discussions about the reproductive health	Yes	None
Male	36	Adult	Testicular Cancer	Testicular cancer	In a relationship	Heterosexual	No	No	Yes	No	No	No	Yes	Yes	No	No	15-20 minutes	Too long	Yes	No	No	No	Myself	Fine	No	No	No	None		Yes	None
Female	25	AYA	Cervical cancer	Gynaecological cancers	In a relationship	Heterosexual	No	No	Yes	No	No	No	Yes	Yes	No	No	20-25 minutes	Just right	Yes	No	No	No	Myself	Fine	No	No	No	None		Yes	None
Female	28	Adult	Breast ca	Breast cancer	Not in a relationship	Heterosexual	No	Add some additional options to questions where they answer does not apply	Yes	No	No	No	Yes	Yes	No	No	25-30 minutes	Too long	Yes	No	No	No	Myself	Fine	No	No	No	None	It's good for cancer patients to given the PROM to help address and answer questions about their sexual and reproductive needs	Yes	None
Female	31	Adult	Primary mediastinal lymphoma	Lymphoma	Not in a relationship	Heterosexual	Sexual orientation – explain. People might not know what the terms mean	No	Yes	No	No	No	Yes	Yes	No	No	25-30 minutes	Just right	Yes	No	No	No	Myself	Fine	No	No	No	None	Equity - Fertility preservation at no cost	No	None
Male	21	AYA	Testicular cancer	Testicular cancer	In a relationship	Heterosexual	No	No	Yes	No	No	No	Yes	Yes	No	No	15-20 minutes	Just right	Yes	No	No	No	Myself	Fine	No	No	No	None		Yes	None
Male	20	AYA	Hodgkin lymphoma	Lymphoma	Not in a relationship	Heterosexual	No	No	Yes	No	No	No	Yes	Yes	No	No	5-10 minutes	Just right	Yes	No	No	No	Myself	Fine	No	No	No	None		Yes	None
Male	4	Paediatrics	leukemia (ALL)	Leukemia	In a relationship	Heterosexual	No	No	Yes	No	No	No	Yes	Yes	No	No	5-10 minutes	Just right	Yes	No	No	No	Myself	Fine	No	No	No	None		Yes	None
Male	19	AYA	Testicular	Testicular cancer	In a relationship	Heterosexual	No	No	Yes	No	No	No	Yes	Yes	No	No	15-20 minutes	Just right	Yes	No	No	No	Myself	Fine	No	No	No	None		Yes	None
Female	18	AYA	Breast	Breast cancer	Not in a relationship	Heterosexual	No	No	No	No	No	No	Yes	Yes	No	No	25-30 minutes	Too long	Yes	No	No	No	Myself	Fine	No	No	No	None		Yes	None
Female	15	AYA	Osteosarcoma	Bone and soft tissue cancers	Not in a relationship	Heterosexual	Yes	Yes	Yes	Yes	No	No	Yes	Yes	No	No	10-15 minutes	Just right	Yes	No	No	No	Myself	Fine	No	No	No	None	I hope this helps others more than anything	No	Very good questions
Female	33	Adult	Breast cancer	Breast cancer	In a relationship	Heterosexual	No	No	Yes	No	No	No	Yes	Yes	No	No	5-10 minutes	Too long	Yes	No	No	No	Myself	Fine	No	No	No	None	Help to ask appropriate questions	Yes	None
Female	12	Paediatrics	ALL	Leukemia	In a relationship	Heterosexual	No	No	No	No	No	No	yes	yes	No	No	Greater than 30 minutes	Too short	Yes	No	No	No	Myself	Fine	Yes	No	Yes	None		Yes	None
Male	41	Adult	Cancer of the tonsil	head and neck cancer	In a relationship	Heterosexual	No	No	Yes	No	No	No	Yes	Yes	No	No	10-15 minutes	Just right	Yes	No	No	No	Myself	Fine	No	Yes	No	None	I htink it is a good idea	Yes	None
Female	18	AYA	Osteosarcoma	Bone and soft tissue cancers	Not in a relationship	Heterosexual	Add not applicable as an option	Not really maybe make sure that young people are aware of the content in the PROM	Yes	No	Yes	No	Yes	Yes	No	No	20-25 minutes	Just right	Yes	Yes	No	No	Myself	Fine	No	No	No	None	Yes I think it would be good	Yes	None
Female	15	AYA	Acute Lymphoblastic Leukaemia		In a relationship	Heterosexual	No	No	Yes	No	No	No	Yes	Yes	No	No	5-10 minutes	Just right	Yes	No	No	No	Myself	Fine	No	No	No	None		No	None
Male	26	Adult	Testicular	Testicular cancer	Not in a relationship	Heterosexual	No	No	Yes	No	No	No	Yes	Yes	No	No	15-20 minutes	Just right	Yes	No	No	No	Myself	Fine	No	No	No	None		Yes	None
Female	19	AYA	Hodgkins Lymphoma	Lymphoma	Not in a relationship	Heterosexual	No	No	Yes	No	No	No	Yes	Yes	No	No	25-30 minutes	Just right	Yes	No	No	No	Myself	Fine	No	No	No	None		Yes	None
Female	3	Paediatrics	Wilms Tumor	Kidney	In a relationship	Heterosexual	No	No	Yes	No	No	No	Yes	Yes	No	No	20-25 minutes	Just right	Yes	No	No	No	Myself	Fine	No	No	No	None		Yes	None
Female	28	Adult	Breast	Breast cancer	In a relationship	Heterosexual	No	No	Yes	No	No	No	Yes	Yes	No	No	25-30 minutes	Just right	Yes	No	No	No	Myself	Fine	No	No	No	None		Yes	None
Male	4	Paediatrics	Acute Lymphoblastic Leukemia	Leukemia	In a relationship	Heterosexual	I generally found the questions to be clear except for the "Fertility concerns following cancer” section as I couldn’t figure out whether or not to respond as some questions seemed more appropriate for females	No	Yes	No	No	Yes	Yes	Yes	No	No	10-15 minutes	Just right	Yes	No	No	No	Myself	Fine	No	No	No	None	It would be a good tool to begin an open discussion	No	None
Male	29	Adult	Ewings	Bone and soft tissue cancers	In a relationship	Heterosexual	No	No	Yes	No	No	No	Yes	Yes	No	No	10-15 minutes	Just right	Yes	No	No	No	Myself	Fine	No	No	No	None		Yes	None
Female	31	Adult	Breast cancer	Breast cancer	In a relationship	Heterosexual	No	No	Yes	No	No	No	Yes	Yes	No	No	20-25 minutes	Just right	Yes	Yes	No	No	Myself	Fine	No	No	No	None	N/A	Yes	The PROM is good as is
Male	23	AYA	germ cell tumour	Testicular cancer	Not in a relationship	Heterosexual	No	No	Yes	No	No	No	Yes	Yes	No	No	10-15 minutes	Too long	Yes	No	No	No	Myself	Fine	No	No	No	None		Yes	None
Female	20	AYA	Hodgkins Lymphoma	Lymphoma	Other	Other	No	No	Yes	No	No	No	Yes	Yes	No	No	25-30 minutes	Just right	Yes	No	No	No	Myself	Fine	No	No	Yes	None		Yes	None
Female	33	Adult	Ependymomal Tumours	Neurological	In a relationship	Heterosexual	No	No	Yes	No	No	No	Yes	Yes	No	No	10-15 minutes	Just right	Yes	No	No	No	Myself	Fine	No	No	No	None		No	None
Female	35	Adult	Skin	Skin	In a relationship	Heterosexual	No	No	Yes	No	No	No	Yes	Yes	No	No	15-20 minutes	Just right	Yes	No	No	No	Myself	Fine	No	No	No	None		Yes	None
Female	41	Adult	Endometrial cancer		In a relationship	Heterosexual	No	No	Yes	No	No	No	Yes	Yes	No	No	15-20 minutes	Just right	Yes	No	No	No	Myself	Fine	No	No	No	None	I think would be helpful	No	None
Male	33	Adult	Brain	Neurological	In a relationship	Heterosexual	No	No	Yes	No	No	No	Yes	Yes	No	No	15-20 minutes	Just right	Yes	No	No	No	Myself	Fine	No	No	No	None		Yes	None
Female	45	Adult	Breast	Breast cancer	Not in a relationship	Heterosexual	No	No	Yes	No	No	No	Yes	Yes	No	No	25-30 minutes	Just right	Yes	No	No	No	Myself	Fine	No	No	No	None		Yes	None
Male	21	AYA	Osteosarcoma	Bone and soft tissue cancers	Not in a relationship	Heterosexual	No	No	Yes	No	No	No	Yes	Yes	No	No	10-15 minutes	Just right	Yes	No	No	No	Myself	Fine	No	No	No	None	Yes	Yes	None
Female	36	Adult	Testicular Cancer	Testicular cancer	In a relationship	Heterosexual	No	some of the questions seem for young people... i got sent this survey at 39?	Yes	No	No	No	Yes	Yes	No	Yes	5-10 minutes	Too long	Yes	No	No	No	Myself	fine	No	No	No	None	this post questions are longer than the actual questionairre	Yes	None
Female	5	Paediatrics	ALL	Leukemia	In a relationship	Heterosexual	No	No	Yes	No	No	No	Yes	Yes	No	No	5-10 minutes	Just right	Yes	No	No	No	Myself	Fine	No	No	No	None		No	None
Female	5	Paediatrics	Acute Lymphoblastic Leukemia	Leukemia	Not in a relationship	Heterosexual	No	No	Yes	No	No	No	Yes	Yes	No	No	25-30 minutes	Just right	Yes	No	No	No	Myself	Fine	No	No	No	None		Yes	None
Female	25	AYA	Cervical cancer	Gynaecological cancers	In a relationship	Heterosexual	No	No	Yes	No	No	No	Yes	Yes	No	No	5-10 minutes	Just right	Yes	No	Yes	No	Myself	Fine	No	No	Yes	None		No	None
Female	19	AYA	Hodgkins Lymphoma	Lymphoma	In a relationship	Heterosexual	No	No	Yes	No	No	No	yes	yes	No	No	10-15 minutes	Just right	Yes	No	No	Yes	Myself	Fine	No	No	No	None	By been in contact with Doctors and Specialists that know my history and know what areas I am worried about, it makes me a little more relaxed. This is due to the fact that I know where I would have to go to answer the questions I have.	No	None
Male	15	AYA	Hodgkins Lymphoma	Lymphoma	In a relationship	Heterosexual	No	Yes more options to say not applicable	Yes	Yes	No	No	Yes	Yes	No	No	20-25 minutes	Just right	Yes	No	Yes	No	Other	Fine	No	No	No	None	So important to be able to bring up topics that probably wouldn't happen otherwise in a consultation	Yes	None - make sure parents aren't around for teenagers completing this questionnaire. It might cause embarrassment.
Male	38	Adult	Head and neck cancer	head and neck cancer	In a relationship	Heterosexual	No	No	Yes	No	No	No	Yes	Yes	No	No	10-15 minutes	Just right	Yes	No	No	No	Myself	Fine	No	Yes	No	None	Wold probably help others have the conversaton	Yes	None
Male	12	Paediatrics	ALL	Leukemia	In a relationship	Heterosexual	No	No	Yes	No	No	No	Yes	Yes	No	No	10-15 minutes	Just right	Yes	No	No	No	Myself	Fine	No	No	No	None		Yes	None
Female	2	Paediatrics	Rhabdomyosarcoma	Bone and soft tissue cancers	Not in a relationship	Heterosexual	No	No	Yes	No	No	No	Yes	Yes	No	No	20-25 minutes	Just right	Yes	No	No	No	Myself	Fine	No	No	No	None		Yes	None
Female	18	AYA	Cervical cancer	Gynaecological cancers	Not in a relationship	Heterosexual	No	No	Yes	No	No	No	Yes	Yes	No	No	25-30 minutes	Just right	Yes	No	No	No	Myself	Fine	No	No	No	None		Yes	None
Female	5	Paediatrics	AML	Leukemia	Not in a relationship	I prefer not to answer	No	No	Yes	No	No	No	Yes	Yes	No	No	Less than 5 minutes	Just right	Yes	No	No	No	Myself	Fine	Yes	No	No	None		No	None
Female	25	AYA	Breast	Breast cancer	In a relationship	Heterosexual	No	No	Yes	No	No	No	Yes	Yes	No	No	25-30 minutes	Just right	Yes	No	No	No	Myself	Fine	No	No	No	None		Yes	None
Female	32	Adult	Breast cancer - DCIS	Breast cancer	In a relationship	Heterosexual	No	The PROM is important	Yes	No	Yes	No	Yes	Yes	No	No	20-25 minutes	Just right	Yes	No	No	No	Myself	Fine	No	No	No	None	So important it will assist patients with being able to ask questions to their oncologist and then getting a referral to have longer more in-depth discussions with a fertility doctor	Yes	Implement immediately!
Female	2	Paediatrics	Rhabdomyosarcoma	Bone and soft tissue cancers	Not in a relationship	Heterosexual	No	No	Yes	No	No	No	Yes	Yes	No	No	5-10 minutes	Just right	Yes	No	No	No	Myself	Not fine	No	No	Yes	None		No	None
Female	7	Paediatrics	Wilms' Tumor	Kidney	Not in a relationship	Heterosexual	No	No	Yes	No	No	No	Yes	Yes	No	No	20-25 minutes	Just right	Yes	No	No	No	Myself	Fine	No	No	No	None		Yes	None
Female	30	Adult	Osteosarcoma	Bone and soft tissue cancers	Not in a relationship	Heterosexual	No	No	Yes	No	No	No	Yes	Yes	No	No	5-10 minutes	Just right	Yes	No	No	No	Myself	Fine	No	Yes	No	None	Good way to bring up the topic with the consultant	Yes	None
Female	42	Adult	Breast cancer		In a relationship	Heterosexual	No	Long term endocrine treatment and fear of stopping it to become pregnant and carry a pregnancy give I am ER + and cancer is a big concern of mine and not in question	Yes	No	No	No	Yes	Yes	No	Yes	10-15 minutes	Just right	Yes	Yes	No	Yes	Myself	Fine	No	No	No	None	It’s comforting and reassuring to know that may symptoms , experiences and fear are not singular. Support on these came for BC support groups like “Think Pink.”	No	My concerns (which I am now at peace with) are that despite fertility preservation, my age and cancer type make me too fearful to attempt pregnancy.
Male	31	Adult	Stage 3 Hodgkins Lymphoma	Lymphoma	In a relationship	Heterosexual	No	No	Yes	No	No	No	Yes	Yes	No	No	10-15 minutes	Too long	Yes	No	No	No	Myself	Fine	No	No	No	None		Yes	None
Female	25	AYA	Testicular	Testicular cancer	Not in a relationship	Heterosexual	No	No	Yes	No	No	No	Yes	Yes	No	No	Greater than 30 minutes	Too long	Yes	No	No	No	Myself	Fine	No	No	No	None		No	None
Male	29	Adult	Testicular	Testicular cancer	Other	Heterosexual	No	No	Yes	No	No	No	Yes	Yes	No	No	15-20 minutes	Too long	Yes	No	No	No	Myself	Fine	No	No	No	None		Yes	None
Male	25	AYA	Breast	Breast cancer	In a relationship	Heterosexual	No	No	Yes	No	No	No	Yes	Yes	No	No	5-10 minutes	Just right	Yes	No	No	No	Myself	Fine	No	No	Yes	None		Yes	None
Male	20	AYA	Hodgkins Lymphoma	Lymphoma	Other	Other	No	No	Yes	No	No	No	Yes	Yes	No	No	10-15 minutes	Just right	Yes	No	No	No	Myself	Fine	No	No	No	None		Yes	None
Female	30	Adult	Breast	Breast cancer	In a relationship	Other	No	No	Yes	No	No	No	Yes	Yes	No	No	10-15 minutes	Too long	Yes	No	No	No	Myself	Fine	No	No	No	None		Yes	None
Female	29	Adult	Testicular	Testicular cancer	Other	Heterosexual	No	No	Yes	No	No	No	Yes	Yes	No	No	10-15 minutes	Just right	Yes	No	No	No	Myself	Fine	No	No	No	None		Yes	None
Male	31	Adult	Hodgkins lymphoma	Lymphoma	In a relationship	Heterosexual	No	No	Yes	No	No	No	Yes	Yes	No	No	15-20 minutes	Just right	Yes	No	No	No	Myself	Fine	No	No	No	None		Yes	None
Female	29	Adult	Brain tumour - Glioblastoma	Neurological	In a relationship	Heterosexual	No	No	Yes	No	No	No	Yes	Yes	No	No	10-15 minutes	Just right	Yes	No	No	Yes	Myself	Fine	No	No	No	None		No	None
Male	25	AYA	cervical cancer	Gynaecological cancers	Not in a relationship	Gay/Lesbian	No	No	Yes	No	No	No	Yes	Yes	No	No	5-10 minutes	Just right	No	No	No	No	Myself	Fine	No	No	No	None		Yes	None
Male	35	Adult	Breast cancer	Breast cancer	In a relationship	Heterosexual	No	No	Yes	No	No	No	Yes	Yes	No	No	25-30 minutes	Just right	Yes	No	No	No	Myself	Fine	No	No	No	None		Yes	None
Female	0	Paediatrics	Neuroblastoma	Neuroblastoma	In a relationship	Heterosexual	No	No	Yes	No	No	No	Yes	Yes	No	No	25-30 minutes	Just right	Yes	No	No	No	Myself	Fine	No	No	No	None		Yes	None
Male	21	AYA	Osteosarcoma	Bone and soft tissue cancers	Not in a relationship	Heterosexual	No	No	Yes	No	No	No	Yes	Yes	No	No	10-15 minutes	Just right	Yes	No	No	No	Myself	Fine	No	No	No	None		Yes	None
Female	19	AYA	Testicular	Testicular cancer	In a relationship	Heterosexual	No	No	Yes	No	No	No	Yes	Yes	No	No	25-30 minutes	Just right	Yes	No	Yes	No	Myself	Fine	Yes	No	Yes	None		Yes	None
Male	23	AYA	Testicular cancer	Testicular cancer	In a relationship	Heterosexual	No	Continues pain and consequences related	Yes	Yes	No	No	Yes	Yes	No	No	20-25 minutes	Just right	Yes	No	No	No	Myself	Not fine	No	No	No	None		Yes	None
Female	38	Adult	Breast	Breast cancer	In a relationship	Heterosexual	No	No	Yes	No	No	No	Yes	Yes	No	No	15-20 minutes	Too long	Yes	No	No	No	Myself	Fine	No	No	No	None		Yes	None
Female	34	Adult	Breast cancer	Breast cancer	In a relationship	Heterosexual	No	No	Yes	No	No	No	Yes	Yes	No	No	10-15 minutes	Just right	Yes	No	No	No	Myself	Fine	No	No	No	None		No	None
Female	16	AYA	Acute lymphoblastic leukemia	Leukemia	Not in a relationship	Heterosexual	No	No	Yes	No	No	No	Yes	Yes	No	No	25-30 minutes	Just right	Yes	No	No	No	Myself	Fine	No	No	No	None		Yes	None
Female	9	Paediatrics	Wilms tumour	Kidney	In a relationship	Heterosexual	No	No	Yes	No	No	No	Yes	Yes	No	No	10-15 minutes	Just right	Yes	No	No	Yes	Myself	Fine	No	No	Yes	None	Won’t be as awkward to bring up the topic or questions	No	None
Male	31	Adult	Sarcoma	Bone and soft tissue cancers	In a relationship	Heterosexual	No	No	Yes	No	No	No	Yes	Yes	No	No	15-20 minutes	Just right	Yes	No	No	No	Myself	Fine	No	No	No	None		Yes	None
Female	29	Adult	Breast cancer	Breast cancer	In a relationship	Heterosexual	In regards to the question: “Have you been investigated for hormonal problems?” I wasn’t sure if this meant just hormones related to reproductive systems eg. Oestrogen/progesterone or all hormones eg. Thyoid?	No	Yes	No	No	No	No	Yes	No	Yes	10-15 minutes	Just right	Yes	No	No	Yes	Myself	Not fine	No	No	No	None	It would make a positive difference as the doctor would know what my concerns are and direct the consultation to those rather than spending time scoping all potential issues. Also made me reflect on what’s important to me.	Yes	Other reproductive concerns that I have include: Will pregnancy increase the risk of my pregnancy coming back? Will it be safe to come off my medication to fall pregnant? Does IVF increase my risk of cancer (ie. all the hormones given). What other options are there for having a child ie. adoption or surrogacy? Is genetic screening possible if I have genetic cause for my cancer for embryos?
Male	26	Adult	Testicular cancer		In a relationship	Heterosexual	No	Add option of not applicable	Yes	No	No	No	Yes	Yes	No	Yes	15-20 minutes	Just right	Yes	No	No	No	Myself	Fine	No	Yes	No	None	Hep ask questions that would probably go unanswered about fertility	Yes	None
Male	20	AYA	Hodgkins	Lymphoma	Not in a relationship	Heterosexual	No	No	Yes	No	No	No	Yes	Yes	No	No	15-20 minutes	Just right	Yes	No	No	No	Myself	Fine	No	No	No	None		Yes	None
Female	29	Adult	TNBC	Breast cancer	In a relationship	Heterosexual		No	Yes	No	No	No	Yes	Yes	No	No	15-20 minutes	Just right	Yes	No	No	No	Myself	Fine	No	No	Yes	None		Yes	None
Female	33	Adult	Primary mediastinal B-cell Lymphoma	Lymphoma	Not in a relationship	Heterosexual	No	No	Yes	No	No	No	Yes	Yes	No	No	20-25 minutes	Just right	Yes	No	No	No	Myself	Fine	No	No	No	None	Unsure	Yes	None
Female	18	AYA	Hodgkins Lymphoma	Lymphoma	In a relationship	I prefer not to answer	No	No	No	No	No	No	Yes	Yes	No	No	10-15 minutes	Too short	Yes	No	No	No	Family	Fine	Yes	No	Yes	None		No	None
Male	33	Adult	PNET	Neurological	In a relationship	Heterosexual	No	No	Yes	No	No	No	Yes	Yes	No	No	15-20 minutes	Just right	Yes	No	No	No	Myself	Fine	No	No	No	None		Yes	None
Female	3	Paediatrics	Wilms Tumor	Kidney	In a relationship	Heterosexual	No	No	Yes	No	No	No	Yes	Yes	No	No	5-10 minutes	Just right	Yes	No	No	No	Myself	Fine	No	No	No	None		Yes	None
Female	36	Adult	Osteosarcoma	Bone and soft tissue cancers	In a relationship	Heterosexual	No	No	Yes	No	No	No	Yes	Yes	No	No	25-30 minutes	Just right	Yes	No	No	No	Myself	Fine	No	No	No	None		Yes	None
Female	35	Adult	DCIS - invasive breast cancer	Breast cancer	In a relationship	Heterosexual	Ask if pregnant before going into some of the other questions	Ask from the outset about fertility preservation	Yes	Yes	No	No	Yes	Yes	No	No	25-30 minutes	Just right	Yes	No	No	No	Myself	Fine	No	No	No	None		Yes	None
Male	28	Adult	Hodgkins Lymphoma	Lymphoma	In a relationship	Heterosexual	No	No	Yes	No	No	No	Yes	Yes	No	No	15-20 minutes	Just right	Yes	No	No	No	Myself	Fine	No	No	No	None		Yes	None
Male	19	AYA	Stage 3b lymphoma		In a relationship	Heterosexual	I thought I accidentally clicked female because so much questions about getting pregnant when as a male I am unable to get pregnant haha	No	Yes	No	No	No	Yes	Yes	No	No	5-10 minutes	Just right	Yes	No	No	No	Myself	Fine	No	No	No	None		Yes	None
Male	25	AYA	Acute myeloid leukemia	Leukemia	In a relationship	Heterosexual	No	No	Yes	No	No	No	Yes	Yes	No	No	15-20 minutes	Just right	Yes	No	No	No	Myself	Fine	No	No	No	None		Yes	None
Male	19	AYA	Testicular	Testicular cancer	In a relationship	Bisexual	No	No	Yes	No	No	No	Yes	Yes	No	No	10-15 minutes	Just right	Yes	No	No	No	Myself	Fine	No	No	No	None		Yes	None
Female	24	AYA	Breat cancer	Breast cancer	In a relationship	Heterosexual	Hormone replacement and hormone treatment are two different things to me but seem to be used interchangeably	No	Yes	No	No	Yes	No	Yes	Yes	No	5-10 minutes	Too long	Yes	No	No	No	Myself	Fine	No	No	No	None	Can’t see how for me but may open conversations for some people to ensure that they are getting treatment for dyspareunia	Yes	None
Male	13	Paediatrics	Acute lymphompbastic leukemia	Leukemia	In a relationship	Heterosexual	No	No	Yes	No	No	No	Yes	Yes	No	No	15-20 minutes	Just right	Yes	No	No	No	Myself	Fine	No	No	No	None		Yes	None
Female	25	AYA	Wilms	Kidney	Other	I prefer not to answer	No	No	Yes	No	No	No	Yes	Yes	No	No	25-30 minutes	Just right	Yes	No	No	No	Myself	Fine	No	No	No	None		Yes	None
Male	28	Adult	Ewings	Bone and soft tissue cancers	Not in a relationship	Heterosexual	No	No	Yes	No	No	No	Yes	Yes	No	No	10-15 minutes	Just right	Yes	No	No	No	Myself	Fine	No	No	No	None	Yes good idea	Yes	Good concept
Female	5	Paediatrics	Acute Lymphoblastic Leukemia	Leukemia	Not in a relationship	Heterosexual	No	No	Yes	No	No	No	Yes	Yes	No	No	5-10 minutes	Just right	Yes	No	No	Yes	Myself	Not fine	No	No	No	None	It'll make me more open to talking about the aspect of reproductive health	Yes	None
Female	41	Adult	Colorectal cancer	Colorectal cancer	In a relationship	Heterosexual	No	No	Yes	No	No	No	Yes	Yes	No	No	25-30 minutes	Just right	Yes	Yes	No	No	Myself	Fine	No	No	No	None	Yes	Yes	None
Female	7	Paediatrics	Wilms' Tumor	Kidney	Not in a relationship	Heterosexual	No	No	Yes	No	No	No	Yes	Yes	No	No	5-10 minutes	Just right	Yes	No	No	Yes	Myself	Not fine	No	No	Yes	Yes	It will make a difference as the doctor may no longer need to go through these more personal questions. By recording information through a survey, the doctor is more aware of the patient's situation and can bring topics up, without having to feel like they are interrogating the patient him/herself.	No	None
Male	23	AYA	Acute Lymphoblastic Leukemia	Leukemia	Not in a relationship	Heterosexual	No	No	Yes	No	No	No	Yes	Yes	No	No	15-20 minutes	Just right	Yes	No	No	No	Myself	Fine	No	No	Yes	Yes		Yes	None
Female	28	Adult	Colorectal cancer stage 4	Colorectal cancer	In a relationship	Heterosexual	No	No	Yes	No	No	No	yes	Yes	No	No	5-10 minutes	Too long	Yes	No	No	No	Myself	Fine	No	No	Yes	Yes	Clearer about questions in my mind	Yes	None
Male	24	AYA	Hodgkins		Not in a relationship	Heterosexual	No	No	Yes	No	No	No	Yes	Yes	No	No	10-15 minutes	Just right	Yes	No	No	No	Myself	Fine	No	No	Yes	Yes	Help with asking questions to my doctor	Yes	None
Male	23	AYA	Stage 4 Hodgkin’s lymphoma		In a relationship	Heterosexual	No	No	Yes	No	No	No	Yes	Yes	No	No	5-10 minutes	Just right	Yes	No	No	No	Myself	Not fine	No	No	Yes	Yes	Unsure	Yes	None
Female	36	Adult	Breast cancer invasive carcinoma grade 3	Breast cancer	In a relationship	Heterosexual	N/A	No	Yes	Yes	No	No	Yes	Yes	No	No	5-10 minutes	Too long	Yes	No	No	No	Myself	Fine	No	No	Yes	Yes		Yes	None
Female	25	AYA	breast cancer	Breast cancer	In a relationship	Heterosexual	No	No	Yes	No	No	No	Yes	Yes	No	No	10-15 minutes	Too long	Yes	No	No	No	Myself	Fine	No	No	Yes	Yes		Yes	ask about changes in period, not just whether it's present or absent
Female	18	AYA	Langerhancellhistiocytosis multiple organ disease , PCOS	Other	Not in a relationship	Heterosexual	No	No	Yes	No	No	No	Yes	Yes	No	No	10-15 minutes	Too long	Yes	No	No	No	Myself	Fine	No	No	Yes	Yes		No	None
Female	33	Adult	Hodgkins Lymphoma	Lymphoma	In a relationship	Heterosexual	Add a further ie. N/A on "how regular are your menstrual periods?", as some people are not having their periods. Number the questions. Remove "if applicable" from the question “have you ever had a menstrual period?” – they can’t answer. Add (more) into Q4&6 of fertility concerns following cancer section. Add (again) into Q5.	No	Yes	No	No	No	Yes	Yes	No	Yes	10-15 minutes	Just right	Yes	Yes	No	No	Myself	Not fine	No	No	Yes	Yes	Pinpoint areas of concern so these could be adequately addressed.	Yes	None
Female	32	Adult	Breast cancer	Breast cancer	In a relationship	Heterosexual	Add other categories where the topic does not apply	No	Yes	No	No	No	Yes	Yes	No	Yes	20-25 minutes	Too long	Yes	Yes	No	No	Myself	Fine	No	No	No	Yes	It would help with asking questions that a cancer doctor may not necessarily discuss	Yes	I think it is a good idea to have a PROM for cancer patients
Male	34	Adult	Testicular cancer	Testicular cancer	Not in a relationship	Heterosexual	No	No	Yes	No	No	No	Yes	Yes	No	No	15-20 minutes	Too long	Yes	No	No	No	Myself	Fine	No	No	No	Yes	Helpful	Yes	None
Male	25	AYA	Osteosarcoma	Bone and soft tissue cancers	In a relationship	Heterosexual	No	No	Yes	No	No	No	Yes	Yes	No	No	10-15 minutes	Just right	Yes	No	No	No	Myself	Fine	Yes	No	Yes	Yes	Yep	Yes	None
Female	3	Paediatrics	acute lymphoblastic leukemia	Leukemia	In a relationship	Heterosexual	No	No	Yes	No	Yes	No	yes	yes	No	Yes	10-15 minutes	Too long	Yes	No	No	No	Myself	Fine	No	No	Yes	Yes	I currently seek support regarding my reproductive health and have for some time	Yes	None
Female	28	Adult	Colorectal cancer	Colorectal cancer	In a relationship	Heterosexual	No	No	Yes	No	No	No	Yes	Yes	No	No	5-10 minutes	Just right	Yes	No	No	No	Myself	Fine	No	No	Yes	Yes	Clearer about questions in my mind	Yes	None
Female	24	AYA	Hodgkin lymphoma stage 3	Lymphoma	Not in a relationship	Heterosexual	No	No	Yes	No	No	No	Yes	Yes	No	No	15-20 minutes	Just right	Yes	No	No	No	Myself	Fine	No	No	Yes	Yes		Yes	None
Female	36	Adult	Stage 3 Bowel Cancer	Colorectal cancer	In a relationship	Heterosexual	No	No	Yes	No	No	No	Yes	Yes	No	No	10-15 minutes	Just right	Yes	Yes	No	No	Myself	Not fine	No	No	Yes	Yes	It would help me know that I've had a chance to raise concerns at the clinic (even if I felt embarrassed or didn't think it was appropriate to raise them.	Yes	None
Female	32	Adult	Breast cancer	Breast cancer	In a relationship	Heterosexual	Some of the questions in the tables cannot be accurately answered by the options to tick. The N/A boxes are missing	No	Yes	No	No	No	Yes	Yes	No	No	25-30 minutes	Just right	Yes	Yes	No	No	Myself	Not fine	No	No	Yes	Yes	It brings up a wide scop of potential problem areas. Might open discussions between Dr and Patient.	Yes	Maybe make it more general if it is just to be used to bring up many potential issues with a Dr or divide it up and make it more specific, if the issues are to do with fertility emotions sexual performance or body image?
Male	6	Paediatrics	A.L.L Leukaemia	Leukemia	In a relationship	Heterosexual	In the tables, such as the one on reproductive concerns, there are too many questions that all sound very similar. Maybe you could combine some of the questions and provide extra writing space for individuals who have concerns.	No	Yes	No	No	No	Yes.	Yes.	No	Yes	10-15 minutes	Too long	Yes	No	No	No	Myself	Not fine	No	No	Yes	Yes	It would ensure that questions relating to reproduction are asked yet it may make patients uncomfortable.	Yes	None
